# Supplementary material for: Direct white light emission from a rare-earth-free aluminium–boron–carbon–oxynitride phosphor
Source: Royal Society of Chemistry journal article supplement (doi:10.1039/c3tc32314e), 2014-01-01
Supplement: c3tc32314e1.pdf [file c3tc32314e1.pdf]

Electronic supplementary information

## Direct White Light Emission from a Rare-Earth-Free Aluminium-Boron-Carbon-Oxynitride Phosphor

T. Ogi<sup>\*,a</sup>, H. Iwasaki<sup>b</sup>, A. B. D. Nandiyanto<sup>a</sup>, F. Iskandar<sup>c</sup>,

W.-N. Wang<sup>d</sup>, and K. Okuyama<sup>a</sup>

**Table S1** Summary of single component white-emitting-phosphor.

| Materials                                                                                                                                                     | method               | operating condition                                              | Emission              | excitation | Quantum efficiency | Ref. |
|---------------------------------------------------------------------------------------------------------------------------------------------------------------|----------------------|------------------------------------------------------------------|-----------------------|------------|--------------------|------|
| Ba <sub>3</sub> MgSi <sub>3</sub> O <sub>8</sub> :Eu <sup>2+</sup> ,Mn <sup>2+</sup>                                                                          | solid state reaction | unknown                                                          | 442, 505, 620 nm      | 375 nm     | unknown            | 6a)  |
| Sr <sub>3</sub> MgSi <sub>2</sub> O <sub>8</sub> :Eu <sup>2+</sup> ,<br>Sr <sub>3</sub> MgSi <sub>2</sub> O <sub>8</sub> :Eu <sup>2+</sup> , Mn <sup>2+</sup> | solid-state reaction | 1250°C for 4 h under H <sub>2</sub> /N <sub>2</sub> atmosphere   | 470, 570, 680 nm      | 375 nm     | unknown            | 6b)  |
| Porous Zinc Gallophosphate                                                                                                                                    | hydrothermal         | 160 °C for 7 days and heated at 280 °C for 4 h                   | 433, 550 nm           | 390 nm     | unknown            | 6c)  |
| Sr <sub>3</sub> B <sub>2</sub> O <sub>6</sub> :Ce <sup>3+</sup> ,Eu <sup>2+</sup>                                                                             | solid state reaction | 900–1000 °C under 15% H <sub>2</sub> /Ar atmosphere              | 434, 574 nm           | 351 nm     | unknown            | 6d)  |
| Sr <sub>3</sub> Al <sub>2</sub> O <sub>5</sub> Cl <sub>2</sub> :Ce <sup>3+</sup> ,Eu <sup>2+</sup>                                                            | solid-state reaction | 1250 °C for 2 h under CO atmosphere                              | 444, 609 nm           | 330 nm     | unknown            | 6e)  |
| Ca <sub>9</sub> Gd(PO <sub>4</sub> ) <sub>7</sub> :Eu <sup>2+</sup> ,Mn <sup>2+</sup>                                                                         | solid state reaction | 1200°C for 4h under H <sub>2</sub> /N <sub>2</sub> atmosphere    | 490, 645 nm           | 254-430 nm | unknown            | 1    |
| Ca <sub>3</sub> Y(GaO) <sub>3</sub> (BO <sub>3</sub> ) <sub>4</sub> :Ce <sup>3+</sup> ,Mn <sup>2+</sup> ,Tb <sup>3+</sup>                                     | solid-state reaction | 1000°C for 8 h under H <sub>2</sub> /N <sub>2</sub> atmosphere   | 409, 589 nm           | 365 nm     | unknown            | 6f)  |
| Ca <sub>4</sub> Y <sub>6</sub> (SiO <sub>4</sub> ) <sub>6</sub> O: Ce <sup>3+</sup> /Mn <sup>2+</sup> /Tb <sup>3+</sup>                                       | solid state reaction | 1350 °C for 2 h                                                  | 410, 614 nm           | 284-424 nm | 13-30%             | 7    |
| LiSr <sub>4</sub> (BO <sub>3</sub> ) <sub>3</sub> :Ce <sup>3+</sup> , Eu <sup>2+</sup>                                                                        | solid-state reaction | 1227 °C for 15h under H <sub>2</sub> /N <sub>2</sub> atmosphere  | 430, 612nm            | 350 nm     | unknown            | 6g)  |
| Na(Sr,Ba)PO <sub>4</sub> :Eu <sup>2+</sup> , Mn <sup>2+</sup>                                                                                                 | solid-state reaction | 1150 °C for 10 h under H <sub>2</sub> /N <sub>2</sub> atmosphere | 440-450, 600 nm       | 390 nm     | unknown            | 6h)  |
| Dy <sup>3+</sup> -activated Ba <sub>3</sub> Bi(PO <sub>4</sub> ) <sub>3</sub>                                                                                 | solid-state reaction | 1250 °C for 3 h                                                  | 487, 575 nm           | 393 nm     | unknown            | 6i)  |
| CaScAlSiO <sub>6</sub> :Ce <sup>3+</sup> ,Tb <sup>3+</sup> ,Mn <sup>2+</sup>                                                                                  | solid state reaction | 1400 °C for 4 h under H <sub>2</sub> /N <sub>2</sub> atmosphere  | 380, 542, 574, 670 nm | 330 nm     | unknown            | 6j)  |
| Ca <sub>2</sub> YF <sub>4</sub> PO <sub>4</sub> :Eu <sup>2+</sup> ,Mn <sup>2+</sup>                                                                           | solid state reaction | 1000 °C for 10 h in H <sub>2</sub> /N <sub>2</sub>               | 570 nm                | 375 nm     | 17.1-22%           | 6k)  |

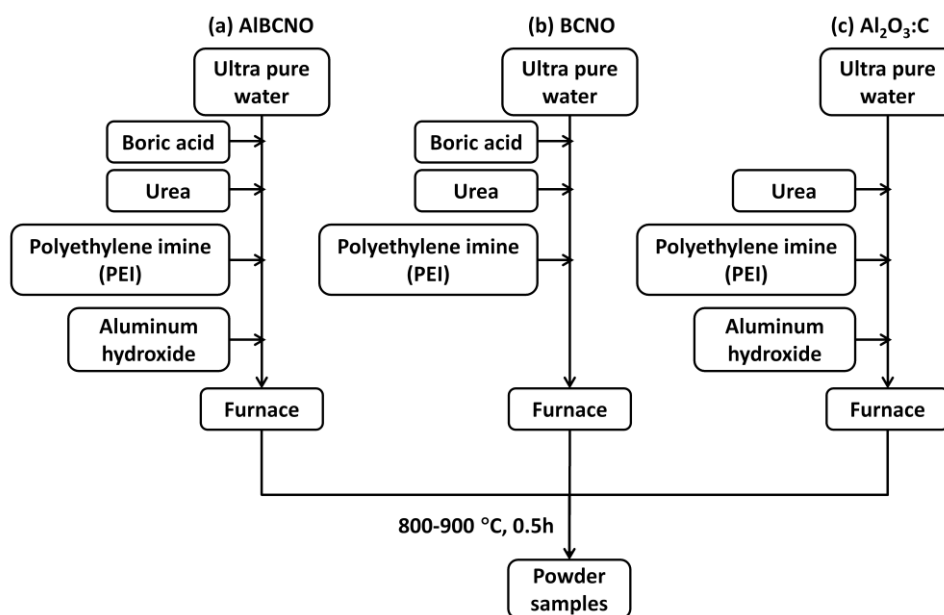

**Figure SI-1** Experimental method.

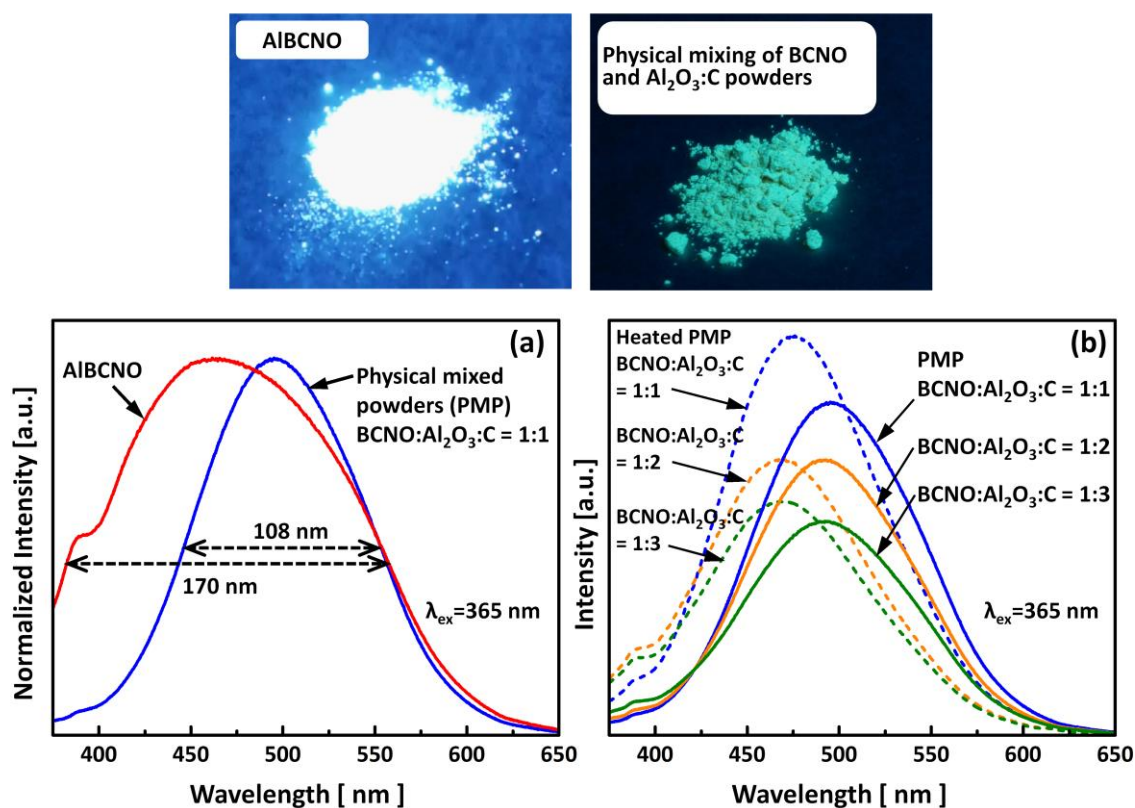

**Figure SI-2** (a) Comparison of the photoluminescence properties between the AIBCNO phosphor and the physically mixed powder sample of the BCNO and  $\text{Al}_2\text{O}_3\text{:C}$  powders, (b) Effects of mixing ratios and heating ( $800^\circ\text{C}$ , 30 min) on the photoluminescence properties.

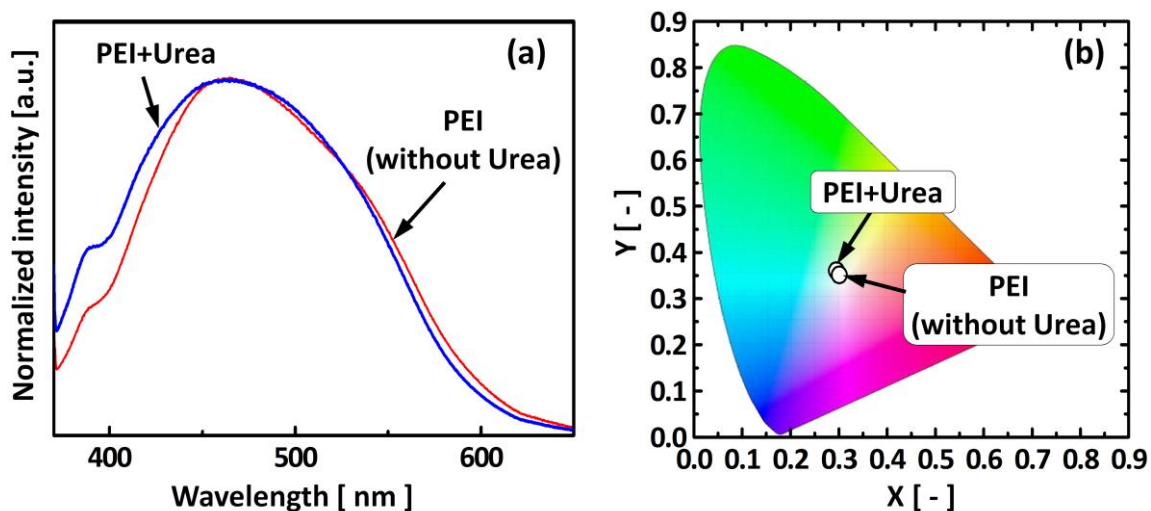

**Figure SI-3** Effect of urea on the PL properties. Emission spectra (a) and colour diagram (b). Synthesis temperature:  $800^\circ\text{C}$ .

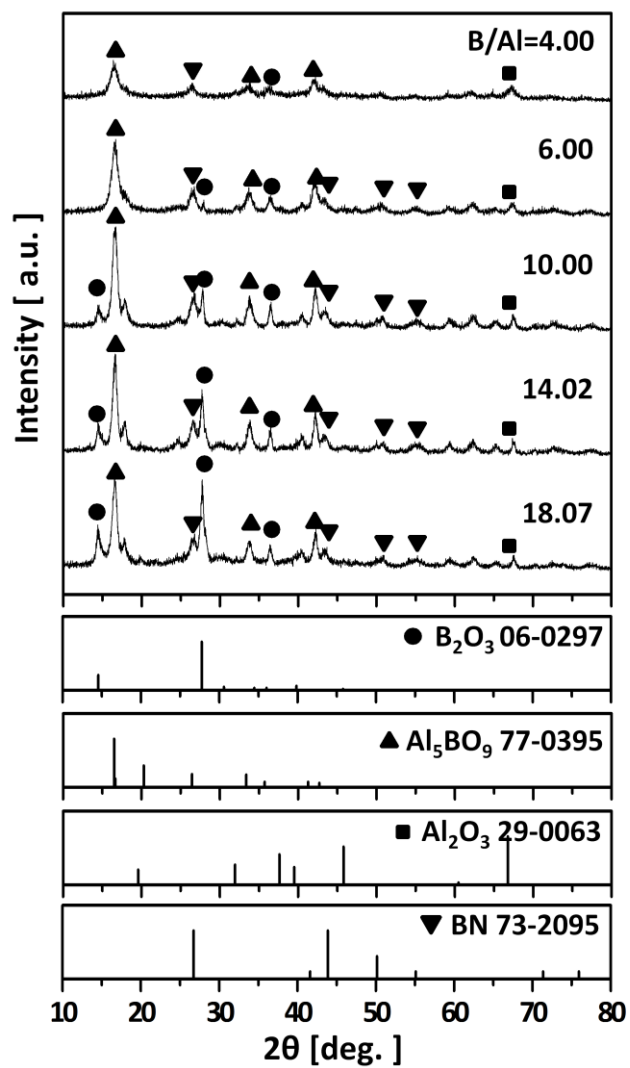

**Figure SI-4** Effect of the B/Al ratio of the AIBCNO phosphor samples on the crystal structures.
